# Supplementary material for: Talar Dome Investigation and Talocrural Joint Axis Analysis Based on Three-Dimensional (3D) Models: Implications for Prosthetic Design
Source: Hindawi journal article supplement (doi:10.1155/2019/8634159), 2019-11-07
Supplement: f1 [file 8634159.f1.zip]

| ID              | Gender | Age | Side       | R-LA      | R-LP      | R-MA      | R-MP      | Inclination Angle of Talar Dome |
|-----------------|--------|-----|------------|-----------|-----------|-----------|-----------|---------------------------------|
| Reference Model | Male   | 33  | Right      | 22.473737 | 18.717387 | 19.28062  | 20.757729 | 8.566                           |
| Model 1         | Male   | 23  | Right      | 17.318732 | 18.398355 | 17.53772  | 21.782868 | 7.634                           |
| Model 2         | Male   | 23  | Left-Right | 20.378612 | 16.732339 | 17.922733 | 21.264819 | 11.496                          |
| Model 3         | Female | 24  | Right      | 17.799709 | 19.571522 | 11.314658 | 28.156842 | 15.634                          |
| Model 4         | Female | 24  | Left-Right | 20.126527 | 26.268699 | 18.741775 | 22.28477  | 8.601                           |
| Model 5         | Female | 23  | Right      | 14.111587 | 15.456499 | 16.742608 | 24.328799 | 17.750                          |
| Model 6         | Female | 23  | Left-Right | 17.621761 | 15.290661 | 17.275739 | 20.453783 | 12.087                          |
| Model 7         | Male   | 25  | Right      | 19.824512 | 20.305429 | 13.727733 | 22.799781 | 10.834                          |
| Model 8         | Male   | 25  | Left-Right | 17.499345 | 16.845669 | 13.2808   | 27.374752 | 12.416                          |
| Model 9         | Male   | 24  | Right      | 22.070689 | 22.865601 | 18.907697 | 27.105788 | 10.942                          |
| Model 10        | Male   | 24  | Left-Right | 20.465577 | 20.350506 | 19.679653 | 24.285791 | 7.442                           |
| Model 11        | Female | 24  | Right      | 15.580487 | 24.090745 | 16.034591 | 26.327893 | 10.169                          |
| Model 12        | Female | 24  | Left-Right | 16.809658 | 17.980511 | 26.753863 | 19.941681 | 17.606                          |
| Model 13        | Female | 25  | Right      | 17.954646 | 17.840518 | 13.86951  | 22.342772 | 13.815                          |
| Model 14        | Female | 25  | Left-Right | 15.206663 | 18.951557 | 19.533637 | 21.53581  | 16.418                          |
| Model 15        | Male   | 25  | Right      | 20.10273  | 16.307456 | 16.112645 | 24.55784  | 8.873                           |
| Model 16        | Male   | 25  | Left-Right | 17.294555 | 18.569461 | 15.353622 | 22.11681  | 9.124                           |
| Model 17        | Male   | 23  | Right      | 22.822489 | 18.569732 | 14.231527 | 24.768824 | 5.119                           |
| Model 18        | Male   | 23  | Left-Right | 20.146647 | 21.362513 | 13.909593 | 22.470794 | 10.469                          |
| Model 19        | Male   | 29  | Left-Right | 16.515521 | 20.558747 | 16.675774 | 21.475659 | 6.868                           |
| Model 20        | Male   | 25  | Right      | 14.954389 | 19.07177  | 15.74062  | 21.288657 | 10.816                          |
| Model 21        | Male   | 25  | Left-Right | 14.949324 | 13.007633 | 14.62671  | 23.896805 | 6.563                           |
| Model 22        | Male   | 26  | Right      | 21.200627 | 18.117627 | 17.948716 | 23.625827 | 5.474                           |
| Model 23        | Male   | 26  | Left-Right | 21.280437 | 22.918483 | 19.230688 | 23.780696 | 6.242                           |
| Model 24        | Male   | 24  | Right      | 17.797769 | 20.058616 | 11.76949  | 17.997789 | 9.984                           |
| Model 25        | Male   | 24  | Left-Right | 19.511442 | 18.319515 | 12.417702 | 19.081821 | 8.873                           |
| Model 26        | Male   | 26  | Left-Right | 20.68175  | 22.764706 | 16.264639 | 24.918835 | 6.743                           |
| Model 27        | Male   | 23  | Right      | 19.313448 | 21.893654 | 22.902809 | 21.727752 | 4.332                           |
| Model 28        | Male   | 23  | Left-Right | 23.023757 | 18.6286   | 24.482767 | 20.064685 | 3.915                           |
| Model 29        | Male   | 23  | Left-Right | 22.449544 | 21.591612 | 16.645635 | 21.46382  | 12.463                          |
| Model 30        | Male   | 37  | Right      | 18.357642 | 15.687297 | 14.598669 | 21.515843 | 8.898                           |
| Model 31        | Male   | 37  | Left-Right | 22.661816 | 19.368753 | 15.592783 | 26.487768 | 8.032                           |
| Model 32        | Male   | 25  | Right      | 22.257782 | 17.662411 | 18.579725 | 21.774702 | 8.277                           |
| Model 33        | Male   | 25  | Left-Right | 17.12967  | 18.099563 | 21.64475  | 20.593727 | 8.976                           |
| Model 34        | Male   | 24  | Right      | 18.506517 | 16.548363 | 16.352632 | 20.305774 | 12.620                          |
| Model 35        | Male   | 24  | Left-Right | 20.052707 | 14.859445 | 13.14678  | 20.780806 | 11.602                          |
| Model 36        | Male   | 24  | Right      | 18.658387 | 17.560456 | 13.952601 | 19.98776  | 9.168                           |
| Model 37        | Male   | 24  | Left-Right | 21.579513 | 17.430724 | 14.768664 | 23.022761 | 12.948                          |
| Model 38        | Female | 21  | Right      | 17.703348 | 19.998658 | 16.327802 | 16.420557 | 9.809                           |
| Model 39        | Female | 21  | Left-Right | 18.945524 | 17.785563 | 12.855502 | 26.145808 | 14.323                          |
| Model 40        | Male   | 25  | Right      | 19.887695 | 19.059667 | 16.998644 | 20.25379  | 7.154                           |
| Model 41        | Male   | 25  | Left-Right | 18.117493 | 16.320694 | 17.089725 | 23.465804 | 12.879                          |
| Model 42        | Female | 25  | Right      | 15.251705 | 24.407521 | 28.155802 | 24.491788 | 20.267                          |
| Model 43        | Female | 25  | Left-Right | 17.362601 | 18.354536 | 13.407553 | 31.617802 | 9.599                           |
| Model 44        | Male   | 22  | Right      | 20.522486 | 21.407637 | 17.189751 | 18.595792 | 8.768                           |
| Model 45        | Male   | 22  | Left-Right | 20.601522 | 19.526429 | 15.324783 | 22.542793 | 9.954                           |
| Model 46        | Male   | 23  | Right      | 22.294677 | 16.595644 | 13.986819 | 29.071766 | 10.221                          |
| Model 47        | Male   | 23  | Left-Right | 21.491805 | 19.149562 | 12.073617 | 27.058841 | 8.642                           |
| Model 48        | Female | 23  | Right      | 17.853409 | 22.955488 | 24.672895 | 22.663862 | 13.799                          |
| Model 49        | Female | 23  | Left-Right | 17.415673 | 24.375587 | 23.931778 | 23.987714 | 13.459                          |
| Model 50        | Male   | 27  | Right      | 21.281566 | 16.031713 | 17.283732 | 24.258832 | 5.486                           |
| Model 51        | Male   | 27  | Left-Right | 21.999761 | 13.900369 | 19.936626 | 19.054799 | 8.382                           |
| Model 52        | Male   | 23  | Right      | 17.672455 | 14.35317  | 14.132743 | 24.880728 | 8.770                           |
| Model 53        | Male   | 23  | Left-Right | 19.851463 | 11.850568 | 16.317671 | 20.87369  | 6.078                           |
| Model 54        | Male   | 31  | Right      | 12.91408  | 21.00649  | 16.837815 | 22.04176  | 9.608                           |
| Model 55        | Male   | 31  | Left-Right | 14.868717 | 18.872426 | 18.879632 | 18.424785 | 9.097                           |
| Model 56        | Male   | 26  | Right      | 24.100591 | 14.439337 | 18.290847 | 23.178863 | 8.595                           |
| Model 57        | Male   | 26  | Left-Right | 18.991681 | 16.540608 | 19.249657 | 22.238698 | 9.016                           |
| Model 58        | Male   | 26  | Right      | 19.650479 | 18.139717 | 18.589865 | 22.34076  | 10.820                          |
| Model 59        | Male   | 26  | Left-Right | 20.412458 | 18.892679 | 14.423758 | 26.821778 | 12.028                          |
| Model 60        | Male   | 33  | Left-Right | 22.396543 | 18.503571 | 13.566525 | 23.820804 | 10.481                          |
| Model 61        | Male   | 25  | Right      | 18.530571 | 16.957618 | 14.26172  | 24.515885 | 9.891                           |
| Model 62        | Male   | 25  | Left-Right | 18.6405   | 15.830602 | 16.031584 | 23.282714 | 10.315                          |
| Model 63        | Male   | 25  | Right      | 21.958648 | 23.659715 | 18.449778 | 21.685688 | 7.318                           |
| Model 64        | Female | 22  | Left-Right | 17.469445 | 15.337612 | 12.095519 | 32.063917 | 14.647                          |
| Model 65        | Male   | 27  | Right      | 22.570678 | 19.317786 | 18.383739 | 22.727711 | 3.465                           |
| Model 66        | Male   | 27  | Left-Right | 22.677499 | 18.731546 | 23.19082  | 18.935828 | 5.013                           |
| Model 67        | Male   | 26  | Right      | 17.570502 | 22.683551 | 16.967807 | 19.098832 | 7.085                           |
| Model 68        | Male   | 26  | Left-Right | 18.264653 | 22.858573 | 17.583818 | 20.361812 | 7.952                           |
| Model 69        | Male   | 24  | Right      | 20.718794 | 17.338685 | 15.376676 | 22.795747 | 9.057                           |
| Model 70        | Male   | 24  | Left-Right | 18.495468 | 18.141557 | 19.009697 | 17.207817 | 10.597                          |
