# Supplementary material for: Talar Dome Investigation and Talocrural Joint Axis Analysis Based on Three-Dimensional (3D) Models: Implications for Prosthetic Design
Source: Hindawi journal article supplement (doi:10.1155/2019/8634159), 2019-11-07
Supplement: f1 [file 8634159.f1.zip]

| ID              | Gender | Age | Side       | Volume (mm^3) | Scaling Factor | Theoretical volume after scaling (mm^3) | Actual volume after scaling (mm^3) | Maximum deviation (+/-mm) | Mean deviation (+/-mm) | Standard deviation (+/-mm) |
|-----------------|--------|-----|------------|---------------|----------------|-----------------------------------------|------------------------------------|---------------------------|------------------------|----------------------------|
| Reference Model | Male   | 33  | Right      | 35741.925     |                |                                         |                                    |                           |                        |                            |
| Model 1         | Male   | 23  | Right      | 20783.265     | 1.198086169    | 35741.925                               | 35741.9253                         | 3.157892/-3.593347        | 0.770149/-0.695618     | 0.928674                   |
| Model 2         | Male   | 23  | Left-Right | 41595.1025    | 0.950703837    | 35741.925                               | 35741.925                          | 2.262826/-3.183660        | 0.593617/-0.643036     | 0.776396                   |
| Model 3         | Female | 24  | Right      | 20734.5793    | 1.199023156    | 35741.925                               | 35739.85431                        | 3.379233/-5.097486        | 0.785568/-0.713110     | 0.95337                    |
| Model 4         | Female | 24  | Left-Right | 41770.6157    | 0.949370401    | 35741.925                               | 35741.925                          | 18.552594/-13.790482      | 0.768520/-0.758705     | 0.969156                   |
| Model 5         | Female | 23  | Right      | 28560.8903    | 1.077627666    | 35741.925                               | 35741.9249                         | 3.435085/-5.588277        | 0.954041/-0.977117     | 1.235117                   |
| Model 6         | Female | 23  | Left-Right | 37462.4503    | 0.984450581    | 35741.925                               | 35741.925                          | 6.763486/-14.522540       | 0.853092/-0.847816     | 1.044702                   |
| Model 7         | Male   | 25  | Right      | 25103.9477    | 1.124981306    | 35741.925                               | 35741.925                          | 2.617108/-2.728633        | 0.728027/-0.682917     | 0.86668                    |
| Model 8         | Male   | 25  | Left-Right | 36853.0049    | 0.989847624    | 35741.925                               | 35741.9251                         | 2.337259/-3.687091        | 0.614734/-0.638816     | 0.793677                   |
| Model 9         | Male   | 24  | Right      | 40792.8078    | 0.95689609     | 35741.925                               | 35741.925                          | 3.305263/-2.953718        | 0.706351/-0.790509     | 0.92776                    |
| Model 10        | Male   | 24  | Left-Right | 38304.7311    | 0.977181359    | 35741.925                               | 35741.925                          | 6.423891/-5.185723        | 1.023797/-0.898173     | 1.203316                   |
| Model 11        | Female | 24  | Right      | 40026.7219    | 0.962962345    | 35741.925                               | 35741.925                          | 4.242726/-3.800814        | 0.763882/-0.855414     | 1.030981                   |
| Model 12        | Female | 24  | Left-Right | 24990.7754    | 1.126676932    | 35741.925                               | 35741.9253                         | 3.801853/-17.152144       | 0.608962/-0.729055     | 0.874807                   |
| Model 13        | Female | 25  | Right      | 40896.1634    | 0.956089299    | 35741.925                               | 35741.925                          | 2.601776/-3.162335        | 0.695054/-0.772926     | 0.904851                   |
| Model 14        | Female | 25  | Left-Right | 33713.2353    | 1.01966889     | 35741.925                               | 35741.9249                         | 5.146033/-5.292232        | 0.893663/-0.911051     | 1.113735                   |
| Model 15        | Male   | 25  | Right      | 32865.77      | 1.028358896    | 35741.925                               | 35741.9248                         | 4.129822/-4.479134        | 0.841462/-0.936646     | 1.171206                   |
| Model 16        | Male   | 25  | Left-Right | 23394.7302    | 1.151736948    | 35741.925                               | 35741.925                          | 3.344808/-3.465082        | 0.695311/-0.764837     | 0.906114                   |
| Model 17        | Male   | 23  | Right      | 40391.67      | 0.96005337     | 35741.925                               | 35741.9249                         | 4.360391/-4.527151        | 0.847608/-0.811796     | 1.072738                   |
| Model 18        | Male   | 23  | Left-Right | 38018.8075    | 0.979624902    | 35741.925                               | 35741.925                          | 19.537212/-26.177775      | 1.066136/-0.947070     | 1.319956                   |
| Model 19        | Male   | 29  | Left-Right | 32921.3235    | 1.027780131    | 35741.925                               | 35741.925                          | 3.026570/-3.248101        | 0.665256/-0.701632     | 0.833231                   |
| Model 20        | Male   | 25  | Right      | 28589.6908    | 1.077265687    | 35741.925                               | 35745.34044                        | 3.944387/-5.590017        | 1.007763/-0.880149     | 1.189092                   |
| Model 21        | Male   | 25  | Left-Right | 36411.733     | 0.993830216    | 35741.925                               | 35741.9251                         | 5.344665/-6.311435        | 0.822739/-0.730789     | 0.967686                   |
| Model 22        | Male   | 26  | Right      | 31826.5268    | 1.039432354    | 35741.925                               | 35741.9251                         | 3.844747/-14.522124       | 0.780008/-0.706997     | 0.967794                   |
| Model 23        | Male   | 26  | Left-Right | 35543.9176    | 1.00185349     | 35741.925                               | 35741.9251                         | 2.661962/-3.256108        | 0.558603/-0.623196     | 0.746992                   |
| Model 24        | Male   | 24  | Right      | 24172.3029    | 1.139252448    | 35741.925                               | 35741.925                          | 3.373058/-5.164954        | 0.890671/-0.765131     | 1.028246                   |
| Model 25        | Male   | 24  | Left-Right | 33887.9813    | 1.017913201    | 35741.925                               | 35741.9252                         | 3.245365/-7.354352        | 0.724923/-0.912750     | 1.010438                   |
| Model 26        | Male   | 26  | Left-Right | 44085.6833    | 0.93245265     | 35741.925                               | 35741.925                          | 4.062068/-9.758494        | 0.897768/-0.853881     | 1.075635                   |
| Model 27        | Male   | 23  | Right      | 35425.8988    | 1.00296479     | 35741.925                               | 35741.925                          | 3.597347/-5.516878        | 0.850293/-0.853607     | 1.04815                    |
| Model 28        | Male   | 23  | Left-Right | 33149.3806    | 1.025417773    | 35741.925                               | 35741.9249                         | 2.985810/-3.538595        | 0.787531/-0.930019     | 1.019327                   |
| Model 29        | Male   | 23  | Left-Right | 37631.7239    | 0.98297229     | 35741.925                               | 35741.925                          | 4.555446/-9.355408        | 0.703824/-0.811884     | 0.969223                   |
| Model 30        | Male   | 37  | Right      | 31904.77      | 1.038581958    | 35741.925                               | 35741.9251                         | 3.178309/-2.712099        | 0.602438/-0.643377     | 0.780016                   |
| Model 31        | Male   | 37  | Left-Right | 27797.0147    | 1.087409845    | 35741.925                               | 35741.9246                         | 2.781580/-3.304051        | 0.645179/-0.726207     | 0.841461                   |
| Model 32        | Male   | 25  | Right      | 32422.8738    | 1.033020193    | 35741.925                               | 35741.9251                         | 3.631003/-4.133767        | 0.914468/-0.823377     | 1.09496                    |
| Model 33        | Male   | 25  | Left-Right | 31767.9667    | 1.040070648    | 35741.925                               | 35741.925                          | 4.190417/-3.730994        | 0.982749/-0.827970     | 1.176206                   |
| Model 34        | Male   | 24  | Right      | 31245.1395    | 1.045839781    | 35741.925                               | 35741.925                          | 3.639292/-4.186858        | 0.989649/-1.001199     | 1.246855                   |
| Model 35        | Male   | 24  | Left-Right | 27864.7847    | 1.086527566    | 35741.925                               | 35741.9251                         | 3.373040/-6.285696        | 0.929236/-0.849548     | 1.132083                   |
| Model 36        | Male   | 24  | Right      | 34305.2305    | 1.013769449    | 35741.925                               | 35741.8775                         | 3.171711/-3.431430        | 0.734287/-0.762073     | 0.932505                   |
| Model 37        | Male   | 24  | Left-Right | 27797.0147    | 1.087409845    | 35741.925                               | 35741.9258                         | 2.6634.4/-3.096111        | 0.678908/-0.723907     | 0.869367                   |
| Model 38        | Female | 21  | Right      | 34616.9785    | 1.010717054    | 35741.925                               | 35741.925                          | 4.950884/-5.887907        | 1.256615/-1.014109     | 1.40859                    |
| Model 39        | Female | 21  | Left-Right | 28216.9633    | 1.081988277    | 35741.925                               | 35741.925                          | 3.642392/-5.436542        | 0.938994/-0.845298     | 1.171632                   |
| Model 40        | Male   | 25  | Right      | 42158.2685    | 0.94645156     | 35741.925                               | 35741.925                          | 18.567637/-12.563596      | 0.631426/-0.760820     | 0.914301                   |
| Model 41        | Male   | 25  | Left-Right | 28595.3793    | 1.077194248    | 35741.925                               | 35741.9248                         | 5.242800/-5.442852        | 1.048483/-0.789774     | 1.20742                    |
| Model 42        | Female | 25  | Right      | 24412.8366    | 1.1354985      | 35741.925                               | 35741.925                          | 2.653462/-3.594617        | 0.773417/-0.743792     | 0.946653                   |
| Model 43        | Female | 25  | Left-Right | 35934.0525    | 0.998214591    | 35741.925                               | 35741.925                          | 19.393084/-20.838455      | 1.003462/-0.954733     | 1.2333074                  |
| Model 44        | Male   | 22  | Right      | 20749.8346    | 1.198729243    | 35741.925                               | 35741.9251                         | 4.194742/-3.708754        | 0.818261/-0.789496     | 1.008722                   |
| Model 45        | Male   | 22  | Left-Right | 26310.3025    | 1.10751776     | 35741.925                               | 35741.9252                         | 3.841344/-3.532820        | 0.598665/-0.791373     | 0.859825                   |
| Model 46        | Male   | 23  | Right      | 36362.8052    | 0.994275764    | 35741.925                               | 35741.9251                         | 9.283103/-10.373791       | 1.117650/-0.934958     | 1.338725                   |
| Model 47        | Male   | 23  | Left-Right | 37660.233     | 0.982724188    | 35741.925                               | 35741.9251                         | 7.037375/-14.885823       | 0.958793/-0.913222     | 1.198659                   |
| Model 48        | Female | 23  | Right      | 24680.4597    | 1.131379308    | 35741.925                               | 35741.8958                         | 3.014781/-3.468129        | 0.568320/-0.709896     | 0.81476                    |
| Model 49        | Female | 23  | Left-Right | 34358.2614    | 1.013247607    | 35741.925                               | 35736.88736                        | 2.403005/-2.982314        | 0.773111/-0.935299     | 1.009593                   |
| Model 50        | Male   | 27  | Right      | 27712.1639    | 1.088518547    | 35741.925                               | 35741.9254                         | 2.696040/-3.374178        | 0.712895/-0.701963     | 0.888824                   |
| Model 51        | Male   | 27  | Left-Right | 33380.9675    | 1.023040923    | 35741.925                               | 35741.925                          | 3.767453/-4.388392        | 0.777805/-0.747546     | 0.940798                   |
| Model 52        | Male   | 23  | Right      | 39507.4253    | 0.967163141    | 35741.925                               | 35741.925                          | 4.285828/-8.023424        | 0.792026/-0.843689     | 1.01699                    |
| Model 53        | Male   | 23  | Left-Right | 36663.7331    | 0.991548021    | 35741.925                               | 35741.9249                         | 2.811137/-2.724569        | 0.543644/-0.612953     | 0.744413                   |
| Model 54        | Male   | 31  | Right      | 34800.8235    | 1.008934113    | 35741.925                               | 35741.913                          | 4.136646/-4.920510        | 0.731107/-0.866708     | 0.996422                   |
| Model 55        | Male   | 31  | Left-Right | 32096.8188    | 1.036506388    | 35741.925                               | 35741.9251                         | 2.769191/-2.628649        | 0.622540/-0.766429     | 0.843552                   |
| Model 56        | Male   | 26  | Right      | 34796.563     | 1.008975289    | 35741.925                               | 35741.9249                         | 3.237077/-2.774594        | 0.657659/-0.643194     | 0.800744                   |
| Model 57        | Male   | 26  | Left-Right | 36525.4648    | 0.992797624    | 35741.925                               | 35741.925                          | 8.347384/-14.063855       | 1.084861/-1.100679     | 1.427113                   |
| Model 58        | Male   | 26  | Right      | 34860.0742    | 1.00836217     | 35741.925                               | 35735.7794                         | 8.811606/-14.179803       | 1.311248/-0.961936     | 1.507541                   |
| Model 59        | Male   | 26  | Left-Right | 37822.4473    | 0.98131726     | 35741.925                               | 35741.925                          | 9.616632/-6.160644        | 0.862132/-0.845070     | 1.100568                   |
| Model 60        | Male   | 33  | Left-Right | 42948.7834    | 0.940608771    | 35741.925                               | 35741.925                          | 2.813520/-2.909138        | 0.600337/-0.650196     | 0.808028                   |
| Model 61        | Male   | 25  | Right      | 27257.5349    | 1.094537018    | 35741.925                               | 35738.29872                        | 3.143398/-3.242590        | 0.739829/-0.700021     | 0.913241                   |
| Model 62        | Male   | 25  | Left-Right | 28327.5271    | 1.080578756    | 35741.925                               | 35741.925                          | 2.503066/-3.518590        | 0.684467/-0.627850     | 0.842021                   |
| Model 63        | Male   | 25  | Right      | 45896.6953    | 0.920023331    | 35741.925                               | 35741.9249                         | 13.681707/-15.807611      | 0.828722/-0.790227     | 1.029157                   |
| Model 64        | Female | 22  | Left-Right | 36230.3765    | 0.995485711    | 35741.925                               | 35741.9248                         | 7.443108/-10.651171       | 1.102204/-1.118578     | 1.425297                   |
| Model 65        | Male   | 27  | Right      | 25476.0809    | 1.119476823    | 35741.925                               | 35741.925                          | 3.240059/-3.782717        | 0.554158/-0.627727     | 0.758642                   |
| Model 66        | Male   | 27  | Left-Right | 28728.4885    | 1.075527999    | 35741.925                               | 35741.925                          | 3.485491/-4.297899        | 0.872956/-0.818389     | 1.04927                    |
| Model 67        | Male   | 26  | Right      | 30806.1943    | 1.050783625    | 35741.925                               | 35743.59596                        | 4.498279/9.416327         | 0.847528/-0.707463     | 1.010976                   |
| Model 68        | Male   | 26  | Left-Right | 35687.8989    | 1.000504362    | 35741.925                               | 35741.925                          | 20.252418/-19.986516      | 1.103086/-1.019368     | 1.389093                   |
| Model 69        | Male   | 24  | Right      | 30321.3984    | 1.056354218    | 35741.925                               | 35741.9248                         | 4.021187/-5.213835        | 0.792559/-0.824457     | 1.061079                   |
| Model 70        | Male   | 24  | Left-Right | 36829.5516    | 0.990057693    | 35741.925                               | 35741.9249                         | 4.441529/-24.466465       | 0.742161/-0.830260     | 0.971045                   |
