# Supplementary material for: Talar Dome Investigation and Talocrural Joint Axis Analysis Based on Three-Dimensional (3D) Models: Implications for Prosthetic Design
Source: Hindawi journal article supplement (doi:10.1155/2019/8634159), 2019-11-07
Supplement: f1 [file 8634159.f1.zip]

| ID              | Gender | Age | Side       | Point | X (mm)       | Y (mm)       | Z (mm)      |
|-----------------|--------|-----|------------|-------|--------------|--------------|-------------|
| Reference Model | Male   | 33  | Right      | LT    | -3.663398743 | 17.75759888  | 8.921703339 |
|                 |        |     |            | LA    | -3.91869162  | 0.567282063  | 0.921703339 |
|                 |        |     |            | LP    | -3.435537655 | 33.10077776  | 0.921703339 |
|                 |        |     |            | MT    | 18.89550018  | 17.56370544  | 11.29190063 |
|                 |        |     |            | MA    | 20.58946185  | 4.721359594  | 6.291900635 |
|                 |        |     |            | MP    | 17.03645279  | 30.94700423  | 6.291900635 |
| Model 1         | Male   | 23  | Right      | LT    | -5.852046967 | 16.90316772  | 10.40742493 |
|                 |        |     |            | LA    | -6.34910385  | 2.313868422  | 2.407424927 |
|                 |        |     |            | LP    | -5.33524576  | 32.0719899   | 2.407424927 |
|                 |        |     |            | MT    | 17.83791733  | 17.96780396  | 11.73705292 |
|                 |        |     |            | MA    | 19.05205781  | 5.765507093  | 6.737052917 |
|                 |        |     |            | MP    | 16.46302432  | 31.78568819  | 6.737052917 |
| Model 2         | Male   | 23  | Left-Right | LT    | -4.651634216 | 17.99337769  | 10.36100006 |
|                 |        |     |            | LA    | -5.753331193 | 1.843007873  | 2.361000061 |
|                 |        |     |            | LP    | -3.703264119 | 32.23439145  | 2.361000061 |
|                 |        |     |            | MT    | 18.085186    | 17.26167297  | 12.05571365 |
|                 |        |     |            | MA    | 19.73555436  | 4.953273466  | 7.055713654 |
|                 |        |     |            | MP    | 16.26475033  | 30.83842966  | 7.055713654 |
| Model 3         | Female | 24  | Right      | LT    | -6.004547119 | 16.93792725  | 9.899082184 |
|                 |        |     |            | LA    | -7.732145679 | 2.17970787   | 1.899082184 |
|                 |        |     |            | LP    | -4.169406454 | 32.61483805  | 1.899082184 |
|                 |        |     |            | MT    | 18.09893799  | 14.05014038  | 11.32800293 |
|                 |        |     |            | MA    | 19.56072218  | 4.776227636  | 6.32800293  |
|                 |        |     |            | MP    | 15.6049949   | 29.87231903  | 6.32800293  |
| Model 4         | Female | 24  | Left-Right | LT    | -1.865398407 | 16.84620667  | 9.464179993 |
|                 |        |     |            | LA    | -2.947103804 | 0.819889124  | 1.464179993 |
|                 |        |     |            | LP    | -0.594608541 | 35.67897862  | 1.464179993 |
|                 |        |     |            | MT    | 16.97156525  | 17.75267029  | 11.0717659  |
|                 |        |     |            | MA    | 18.02476421  | 5.052184436  | 6.0717659   |
|                 |        |     |            | MP    | 15.80915685  | 31.77010854  | 6.0717659   |
| Model 5         | Female | 23  | Right      | LT    | -8.304473877 | 17.06719971  | 10.10242081 |
|                 |        |     |            | LA    | -9.476300566 | 4.402004637  | 2.102420807 |
|                 |        |     |            | LP    | -7.057154645 | 30.54832413  | 2.102420807 |
|                 |        |     |            | MT    | 17.71366501  | 16.59442139  | 11.33443069 |
|                 |        |     |            | MA    | 20.28927721  | 4.941821504  | 6.334430695 |
|                 |        |     |            | MP    | 14.52501436  | 31.02053345  | 6.334430695 |
| Model 6         | Female | 23  | Left-Right | LT    | -7.215572357 | 17.29013062  | 9.966884613 |
|                 |        |     |            | LA    | -8.54751941  | 2.587426802  | 1.966884613 |
|                 |        |     |            | LP    | -6.002941378 | 30.67576339  | 1.966884613 |
|                 |        |     |            | MT    | 18.32833481  | 18.13085938  | 11.32507324 |
|                 |        |     |            | MA    | 19.79082733  | 6.063875231  | 6.325073242 |
|                 |        |     |            | MP    | 16.71621122  | 31.43244518  | 6.325073242 |
| Model 7         | Male   | 25  | Right      | LT    | -5.074958801 | 16.19920349  | 10.4234848  |
|                 |        |     |            | LA    | -5.617127547 | 0.296791656  | 2.423484802 |
|                 |        |     |            | LP    | -4.524615554 | 32.34138255  | 2.423484802 |
|                 |        |     |            | MT    | 17.56097794  | 15.58891296  | 11.11849213 |
|                 |        |     |            | MA    | 19.19679761  | 5.120066     | 6.118492126 |
|                 |        |     |            | MP    | 15.3614182   | 29.66555883  | 6.118492126 |
| Model 8         | Male   | 25  | Left-Right | LT    | -6.193031311 | 17.44224548  | 10.07034683 |
|                 |        |     |            | LA    | -7.386234054 | 2.794605677  | 2.070346832 |
|                 |        |     |            | LP    | -5.029059225 | 31.73105261  | 2.070346832 |
|                 |        |     |            | MT    | 16.92798615  | 14.77351379  | 10.94964981 |
|                 |        |     |            | MA    | 18.32977564  | 4.485673189  | 5.949649811 |
|                 |        |     |            | MP    | 14.7987017   | 30.40049566  | 5.949649811 |
| Model 9         | Male   | 24  | Right      | LT    | -3.592140198 | 16.59147644  | 9.55979538  |
|                 |        |     |            | LA    | -3.985202111 | -0.407576234 | 1.55979538  |
|                 |        |     |            | LP    | -3.190527935 | 33.96031269  | 1.55979538  |
|                 |        |     |            | MT    | 14.56023026  | 15.82987976  | 11.10790253 |
|                 |        |     |            | MA    | 16.70020182  | 3.2009816    | 6.107902527 |
|                 |        |     |            | MP    | 11.93960036  | 31.29535071  | 6.107902527 |
| Model 10        | Male   | 24  | Left-Right | LT    | -5.243247986 | 16.12339783  | 9.49426651  |
|                 |        |     |            | LA    | -4.24551446  | -7.67E-02    | 1.49426651  |
|                 |        |     |            | LP    | -6.237485735 | 32.26673622  | 1.49426651  |
|                 |        |     |            | MT    | 15.42416382  | 16.66091919  | 10.72824478 |
|                 |        |     |            | MA    | 17.91754731  | 3.793543338  | 5.728244781 |
|                 |        |     |            | MP    | 12.61631683  | 31.15111803  | 5.728244781 |
| Model 11        | Female | 24  | Right      | LT    | -4.784915924 | 14.21134949  | 9.887439728 |
|                 |        |     |            | LA    | -5.063418284 | 0.602438929  | 1.887439728 |
|                 |        |     |            | LP    | -4.418084043 | 32.13644807  | 1.887439728 |
|                 |        |     |            | MT    | 18.25575638  | 16.87013245  | 11.43972397 |
|                 |        |     |            | MA    | 20.07492644  | 5.379809714  | 6.439723969 |
|                 |        |     |            | MP    | 15.84194219  | 32.1163728   | 6.439723969 |

|          |        |    |            |    |              |             |             |
|----------|--------|----|------------|----|--------------|-------------|-------------|
| Model 12 | Female | 24 | Left-Right | LT | -5.342258453 | 16.06195068 | 9.52481842  |
|          |        |    |            | LA | -6.366970943 | 1.782648422 | 1.52481842  |
|          |        |    |            | LP | -4.301092034 | 30.98154845 | 1.52481842  |
|          |        |    |            | MT | 16.44877625  | 19.17475891 | 10.63125229 |
|          |        |    |            | MA | 20.07665696  | 4.029755242 | 5.631252289 |
|          |        |    |            | MP | 13.32916151  | 32.00734496 | 5.631252289 |
| Model 13 | Female | 25 | Right      | LT | -5.693172455 | 16.65444946 | 9.886730194 |
|          |        |    |            | LA | -6.352010616 | 1.726849662 | 1.886730194 |
|          |        |    |            | LP | -5.033597791 | 31.52064534 | 1.886730194 |
|          |        |    |            | MT | 17.24755096  | 16.7437439  | 11.40744781 |
|          |        |    |            | MA | 19.33935594  | 6.28856483  | 6.407447815 |
|          |        |    |            | MP | 14.49800402  | 30.55894619 | 6.407447815 |
| Model 14 | Female | 25 | Left-Right | LT | -7.240936279 | 16.20176697 | 10.13902664 |
|          |        |    |            | LA | -8.433655723 | 2.864631579 | 2.139026642 |
|          |        |    |            | LP | -5.862174167 | 31.6067739  | 2.139026642 |
|          |        |    |            | MT | 18.22592545  | 16.95994568 | 11.17168808 |
|          |        |    |            | MA | 20.78803592  | 4.163015365 | 6.17168808  |
|          |        |    |            | MP | 15.52473628  | 30.48974202 | 6.17168808  |
| Model 15 | Male   | 25 | Right      | LT | -5.569812775 | 18.05827332 | 10.37462997 |
|          |        |    |            | LA | -6.11003074  | 2.016287828 | 2.374629974 |
|          |        |    |            | LP | -5.183372789 | 32.08542284 | 2.374629974 |
|          |        |    |            | MT | 16.88996887  | 16.79940796 | 11.12582779 |
|          |        |    |            | MA | 18.31643844  | 5.219954627 | 6.125827789 |
|          |        |    |            | MP | 15.03497366  | 31.53477796 | 6.125827789 |
| Model 16 | Male   | 25 | Left-Right | LT | -5.575267792 | 17.46894836 | 10.43527985 |
|          |        |    |            | LA | -6.50152684  | 2.913994973 | 2.435279846 |
|          |        |    |            | LP | -4.605617552 | 32.70573776 | 2.435279846 |
|          |        |    |            | MT | 16.94054031  | 17.00698853 | 11.22231293 |
|          |        |    |            | MA | 18.02372924  | 5.721816934 | 6.222312927 |
|          |        |    |            | MP | 15.60236923  | 30.94868413 | 6.222312927 |
| Model 17 | Male   | 23 | Right      | LT | -3.390026093 | 17.66897583 | 9.543117523 |
|          |        |    |            | LA | -3.193416767 | 0.316568962 | 1.543117523 |
|          |        |    |            | LP | -3.563006537 | 32.93593757 | 1.543117523 |
|          |        |    |            | MT | 19.65153885  | 14.76940918 | 10.45146179 |
|          |        |    |            | MA | 20.74007664  | 3.993434703 | 5.451461792 |
|          |        |    |            | MP | 18.15177033  | 29.6163602  | 5.451461792 |
| Model 18 | Male   | 23 | Left-Right | LT | -3.905368805 | 16.579422   | 9.484302521 |
|          |        |    |            | LA | -4.630746396 | 0.522909148 | 1.484302521 |
|          |        |    |            | LP | -3.152624487 | 33.22936377 | 1.484302521 |
|          |        |    |            | MT | 19.85984802  | 15.10870361 | 10.71500015 |
|          |        |    |            | MA | 21.33082759  | 4.529247293 | 5.715000153 |
|          |        |    |            | MP | 17.92848174  | 29.10765198 | 5.715000153 |
| Model 19 | Male   | 29 | Left-Right | LT | -6.267341614 | 15.67240906 | 9.525867462 |
|          |        |    |            | LA | -7.257781907 | 1.556488706 | 1.525867825 |
|          |        |    |            | LP | -5.817366907 | 31.94296871 | 1.525867825 |
|          |        |    |            | MT | 16.77455521  | 17.60134888 | 10.19289017 |
|          |        |    |            | MA | 17.58050073  | 5.722674044 | 5.192890167 |
|          |        |    |            | MP | 15.72026813  | 31.3357516  | 5.192890167 |
| Model 20 | Male   | 25 | Right      | LT | -7.043258667 | 15.7822113  | 10.73516846 |
|          |        |    |            | LA | -7.18974729  | 2.544376149 | 2.735168457 |
|          |        |    |            | LP | -6.871429104 | 31.31004811 | 2.735168457 |
|          |        |    |            | MT | 17.11155701  | 19.07023621 | 11.8181839  |
|          |        |    |            | MA | 19.14555365  | 7.745004218 | 6.818183899 |
|          |        |    |            | MP | 14.68860696  | 32.56114897 | 6.818183899 |
| Model 21 | Male   | 25 | Left-Right | LT | -8.159618378 | 15.98512268 | 10.05912018 |
|          |        |    |            | LA | -7.540961691 | 2.764038872 | 2.059120178 |
|          |        |    |            | LP | -8.720753547 | 27.97693536 | 2.059120178 |
|          |        |    |            | MT | 17.52416611  | 17.53364563 | 11.93920517 |
|          |        |    |            | MA | 19.29270512  | 6.664708365 | 6.93920517  |
|          |        |    |            | MP | 15.17496554  | 31.97116352 | 6.93920517  |
| Model 22 | Male   | 26 | Right      | LT | -5.963924408 | 17.39108276 | 9.690567017 |
|          |        |    |            | LA | -6.103905047 | 0.802514802 | 1.690567017 |
|          |        |    |            | LP | -5.837107492 | 32.41966847 | 1.690567017 |
|          |        |    |            | MT | 17.53948212  | 18.01831055 | 11.33818054 |
|          |        |    |            | MA | 18.62073457  | 5.63644153  | 6.338180542 |
|          |        |    |            | MP | 16.27506165  | 32.4977123  | 6.338180542 |
| Model 23 | Male   | 26 | Left-Right | LT | -3.313262939 | 17.11216736 | 9.585037231 |
|          |        |    |            | LA | -4.13645295  | 0.505108827 | 1.585037231 |
|          |        |    |            | LP | -2.451104023 | 34.48850182 | 1.585037231 |
|          |        |    |            | MT | 18.79735565  | 17.59887695 | 11.29112625 |
|          |        |    |            | MA | 19.54473272  | 4.686114508 | 6.291126251 |
|          |        |    |            | MP | 17.91123653  | 32.15945182 | 6.291126251 |

|          |      |    |            |    |              |             |             |
|----------|------|----|------------|----|--------------|-------------|-------------|
| Model 24 | Male | 24 | Right      | LT | -5.792190552 | 16.27690125 | 11.26179504 |
|          |      |    |            | LA | -6.383432699 | 1.430683033 | 3.261795044 |
|          |      |    |            | LP | -5.171438094 | 32.2938696  | 3.261795044 |
|          |      |    |            | MT | 16.8089447   | 16.9052124  | 11.50444031 |
|          |      |    |            | MA | 18.09045568  | 7.363423466 | 6.504440308 |
| Model 25 | Male | 24 | Left-Right | MP | 15.11895091  | 29.23875645 | 6.504440308 |
|          |      |    |            | LT | -5.574668884 | 17.29414368 | 10.9743576  |
|          |      |    |            | LA | -5.683574887 | 1.541100184 | 2.974357605 |
|          |      |    |            | LP | -5.470030357 | 32.42990504 | 2.974357605 |
|          |      |    |            | MT | 17.10151672  | 17.2747345  | 12.23970413 |
| Model 26 | Male | 26 | Left-Right | MA | 18.56944424  | 7.424974228 | 7.239704132 |
|          |      |    |            | MP | 15.20342015  | 30.01091931 | 7.239704132 |
|          |      |    |            | LT | -6.037700653 | 16.58886719 | 8.996425629 |
|          |      |    |            | LA | -5.726197168 | 0.254711559 | 0.996425629 |
|          |      |    |            | LP | -6.387631121 | 33.91238134 | 0.996425629 |
| Model 27 | Male | 23 | Right      | MT | 18.8064537   | 17.1190033  | 9.438995361 |
|          |      |    |            | MA | 20.41251937  | 5.497523354 | 4.438995361 |
|          |      |    |            | MP | 16.75673675  | 31.9507408  | 4.438995361 |
|          |      |    |            | LT | -6.520523071 | 16.40336609 | 9.452022552 |
|          |      |    |            | LA | -6.994660615 | 0.757987612 | 1.452022552 |
| Model 28 | Male | 23 | Left-Right | LP | -6.008236969 | 33.31568178 | 1.452022552 |
|          |      |    |            | MT | 18.15511703  | 18.40228271 | 10.33620071 |
|          |      |    |            | MA | 18.80242242  | 4.133356446 | 5.336200714 |
|          |      |    |            | MP | 17.52715024  | 32.25417393 | 5.336200714 |
|          |      |    |            | LT | -6.107318878 | 17.69273376 | 9.585609436 |
| Model 29 | Male | 23 | Left-Right | LA | -6.574459989 | 0.252705782 | 1.585609436 |
|          |      |    |            | LP | -5.697682366 | 32.98591192 | 1.585609436 |
|          |      |    |            | MT | 17.67356491  | 19.01907349 | 10.59771347 |
|          |      |    |            | MA | 18.289551    | 4.205595259 | 5.59771347  |
|          |      |    |            | MP | 17.12295099  | 32.26045568 | 5.59771347  |
| Model 30 | Male | 37 | Right      | LT | -2.17432785  | 19.59571838 | 9.897323608 |
|          |      |    |            | LA | -3.214135055 | 2.446422567 | 1.897323608 |
|          |      |    |            | LP | -1.201208857 | 36.34409975 | 1.897323608 |
|          |      |    |            | MT | 17.92238998  | 17.68904114 | 10.60002899 |
|          |      |    |            | MA | 19.79434172  | 5.944099941 | 5.600028992 |
| Model 31 | Male | 37 | Left-Right | MP | 15.75115464  | 31.28749726 | 5.600028992 |
|          |      |    |            | LT | -6.832103729 | 16.97807312 | 10.07195663 |
|          |      |    |            | LA | -7.809605555 | 1.853280491 | 2.071956635 |
|          |      |    |            | LP | -5.950187165 | 30.6238841  | 2.071956635 |
|          |      |    |            | MT | 19.31577682  | 16.60444641 | 11.59056091 |
| Model 32 | Male | 25 | Right      | MA | 20.31273303  | 5.650615258 | 6.590560913 |
|          |      |    |            | MP | 18.06589035  | 30.33729182 | 6.590560913 |
|          |      |    |            | LT | -5.093547821 | 17.61045837 | 9.003475189 |
|          |      |    |            | LA | -4.948878826 | 0.331490129 | 1.003475189 |
|          |      |    |            | LP | -5.148532965 | 33.29138344 | 1.003475189 |
| Model 33 | Male | 25 | Left-Right | MT | 18.4468956   | 17.29801941 | 9.977443695 |
|          |      |    |            | MA | 20.10529231  | 5.976669873 | 4.977443695 |
|          |      |    |            | MP | 16.18093984  | 32.61902361 | 4.977443695 |
|          |      |    |            | LT | -4.888912201 | 17.40953064 | 9.721343994 |
|          |      |    |            | LA | -4.813442485 | 0.318228237 | 1.721343994 |
| Model 34 | Male | 24 | Right      | LP | -4.954196037 | 32.19408063 | 1.721343994 |
|          |      |    |            | MT | 17.4920578   | 18.21711731 | 11.67586899 |
|          |      |    |            | MA | 19.37281429  | 5.677079696 | 6.675868988 |
|          |      |    |            | MP | 15.43291759  | 31.94653727 | 6.675868988 |
|          |      |    |            | LT | -6.001785278 | 16.1174469  | 9.705863953 |
| Model 35 | Male | 24 | Left-Right | LA | -6.514888435 | 1.632785164 | 1.705863953 |
|          |      |    |            | LP | -5.477007025 | 31.12773601 | 1.705863953 |
|          |      |    |            | MT | 17.29774094  | 18.07397461 | 10.83683014 |
|          |      |    |            | MA | 18.97494977  | 4.339851445 | 5.836830139 |
|          |      |    |            | MP | 15.66829239  | 31.4258903  | 5.836830139 |
| Model 36 | Male | 24 | Right      | LT | -5.813434601 | 18.0940094  | 10.65917206 |
|          |      |    |            | LA | -7.306118738 | 2.932676175 | 2.659172058 |
|          |      |    |            | LP | -4.425152987 | 32.19491637 | 2.659172058 |
|          |      |    |            | MT | 18.06517029  | 16.08314514 | 11.67885971 |
|          |      |    |            | MA | 19.49893956  | 4.401439108 | 6.678859711 |
| Model 37 | Male | 24 | Left-Right | MP | 16.4396281   | 29.32733049 | 6.678859711 |
|          |      |    |            | LT | -5.78830719  | 19.07391357 | 10.78757477 |
|          |      |    |            | LA | -7.602941876 | 3.150868828 | 2.787574768 |
|          |      |    |            | LP | -4.307368351 | 32.17163595 | 2.787574768 |
|          |      |    |            | MT | 18.7431488   | 14.5269165  | 11.33007813 |
| Model 38 | Male | 24 | Left-Right | MA | 19.65923885  | 4.249514906 | 6.330078125 |
|          |      |    |            | MP | 17.53040469  | 27.99284338 | 6.330078125 |

|          |        |    |            |    |              |              |             |
|----------|--------|----|------------|----|--------------|--------------|-------------|
| Model 36 | Male   | 24 | Right      | LT | -6.593544006 | 16.9936676   | 9.894943237 |
|          |        |    |            | LA | -7.588558782 | 1.711944479  | 1.894943237 |
|          |        |    |            | LP | -5.641524417 | 31.69232638  | 1.894943237 |
|          |        |    |            | MT | 20.08459473  | 15.84411621  | 9.989334106 |
|          |        |    |            | MA | 21.09840217  | 5.190898248  | 4.989334106 |
|          |        |    |            | MP | 18.82509217  | 29.0078571   | 4.989334106 |
| Model 37 | Male   | 24 | Left-Right | LT | -6.136257172 | 18.4155426   | 9.617183685 |
|          |        |    |            | LA | -7.690933991 | 1.716981171  | 1.617183685 |
|          |        |    |            | LP | -4.781320991 | 33.01179253  | 1.617183685 |
|          |        |    |            | MT | 18.93540955  | 15.6656189   | 10.02190399 |
|          |        |    |            | MA | 20.40417735  | 4.687331299  | 5.021903992 |
|          |        |    |            | MP | 17.02866115  | 29.86362208  | 5.021903992 |
| Model 38 | Female | 21 | Right      | LT | -3.348747253 | 15.72407532  | 9.918773651 |
|          |        |    |            | LA | -3.850123221 | 0.925779699  | 1.918773651 |
|          |        |    |            | LP | -2.825001073 | 31.71457326  | 1.918773651 |
|          |        |    |            | MT | 16.33501816  | 17.59179688  | 12.02871323 |
|          |        |    |            | MA | 17.95346074  | 5.944729547  | 7.028713226 |
|          |        |    |            | MP | 14.71504545  | 29.27816276  | 7.028713226 |
| Model 39 | Female | 21 | Left-Right | LT | -5.226486206 | 17.25886536  | 10.24526978 |
|          |        |    |            | LA | -6.163873067 | 1.823864507  | 2.245269775 |
|          |        |    |            | LP | -4.326208292 | 32.08283073  | 2.245269775 |
|          |        |    |            | MT | 17.19179535  | 14.81565857  | 11.78133011 |
|          |        |    |            | MA | 19.10682696  | 4.82166787   | 6.781330109 |
|          |        |    |            | MP | 14.29794289  | 29.91782947  | 6.781330109 |
| Model 40 | Male   | 25 | Right      | LT | -3.660293579 | 17.87721252  | 10.14382172 |
|          |        |    |            | LA | -3.560301071 | 1.934004519  | 2.143821716 |
|          |        |    |            | LP | -3.757645438 | 33.39938474  | 2.143821716 |
|          |        |    |            | MT | 15.80896378  | 17.86740112  | 11.94919205 |
|          |        |    |            | MA | 17.38339344  | 5.930103813  | 6.949192047 |
|          |        |    |            | MP | 14.06671544  | 31.07709655  | 6.949192047 |
| Model 41 | Male   | 25 | Left-Right | LT | -6.083999634 | 17.28947449  | 9.145591736 |
|          |        |    |            | LA | -7.891794907 | 2.369638706  | 1.145591825 |
|          |        |    |            | LP | -4.466934907 | 31.23619871  | 1.145591825 |
|          |        |    |            | MT | 17.51585388  | 16.02374268  | 9.998241425 |
|          |        |    |            | MA | 18.79830713  | 4.013500086  | 4.998241425 |
|          |        |    |            | MP | 15.97019913  | 30.42033017  | 4.998241425 |
| Model 42 | Female | 25 | Right      | LT | -4.490447998 | 14.80543518  | 8.745079041 |
|          |        |    |            | LA | -5.45924626  | 1.423192526  | 0.745079041 |
|          |        |    |            | LP | -3.172154589 | 32.82672048  | 0.745079041 |
|          |        |    |            | MT | 16.35372925  | 18.17788696  | 9.966712952 |
|          |        |    |            | MA | 20.79014118  | 2.787398895  | 4.966712952 |
|          |        |    |            | MP | 12.23508494  | 32.42381184  | 4.966712952 |
| Model 43 | Female | 25 | Left-Right | LT | -5.75409317  | 16.23248291  | 9.203105927 |
|          |        |    |            | LA | -6.477771471 | 1.628701255  | 1.203105927 |
|          |        |    |            | LP | -5.216463907 | 31.37757871  | 1.203105825 |
|          |        |    |            | MT | 18.43527222  | 14.56382751  | 11.08588791 |
|          |        |    |            | MA | 19.73541065  | 4.20150842   | 6.085887909 |
|          |        |    |            | MP | 16.30162958  | 31.49353574  | 6.085887909 |
| Model 44 | Male   | 22 | Right      | LT | -1.296604156 | 15.95504761  | 9.821155548 |
|          |        |    |            | LA | -1.555965119 | -0.301632608 | 1.821155548 |
|          |        |    |            | LP | -1.030384689 | 32.64161718  | 1.821155548 |
|          |        |    |            | MT | 17.53574371  | 17.19787598  | 11.45176697 |
|          |        |    |            | MA | 19.19198379  | 5.191697685  | 6.451766968 |
|          |        |    |            | MP | 15.80204526  | 29.76555441  | 6.451766968 |
| Model 45 | Male   | 22 | Left-Right | LT | -1.843460083 | 15.76011658  | 9.932666779 |
|          |        |    |            | LA | -1.868947744 | -0.537479685 | 1.932666779 |
|          |        |    |            | LP | -1.818811601 | 31.52111596  | 1.932666779 |
|          |        |    |            | MT | 17.36813736  | 15.35673523  | 11.69410324 |
|          |        |    |            | MA | 19.30824472  | 4.199705064  | 6.694103241 |
|          |        |    |            | MP | 14.94275846  | 29.30443017  | 6.694103241 |
| Model 46 | Male   | 23 | Right      | LT | -5.499526978 | 17.94694519  | 10.24858475 |
|          |        |    |            | LA | -5.84102889  | 0.841713403  | 2.248584747 |
|          |        |    |            | LP | -5.220318457 | 32.14012046  | 2.248584747 |
|          |        |    |            | MT | 18.95137024  | 16.49266052  | 10.08184814 |
|          |        |    |            | MA | 20.64488626  | 5.909799955  | 5.081848145 |
|          |        |    |            | MP | 16.37887823  | 32.58889296  | 5.081848145 |
| Model 47 | Male   | 23 | Left-Right | LT | -4.687828064 | 17.79560852  | 9.74369812  |
|          |        |    |            | LA | -5.582969691 | 1.090449758  | 1.74369812  |
|          |        |    |            | LP | -3.854780456 | 33.34196693  | 1.74369812  |
|          |        |    |            | MT | 17.92629242  | 15.23049927  | 10.55042648 |
|          |        |    |            | MA | 18.87684485  | 5.49257316   | 5.550426483 |
|          |        |    |            | MP | 16.40382477  | 30.82740589  | 5.550426483 |

|          |        |    |            |    |              |             |             |
|----------|--------|----|------------|----|--------------|-------------|-------------|
| Model 48 | Female | 23 | Right      | LT | -4.41255188  | 15.94737244 | 8.812660217 |
|          |        |    |            | LA | -4.453982642 | 1.059753783 | 0.812660217 |
|          |        |    |            | LP | -4.384138686 | 33.36207001 | 0.812660217 |
|          |        |    |            | MT | 16.11403275  | 18.14305115 | 10.29188156 |
|          |        |    |            | MA | 19.62031079  | 3.671325275 | 5.291881561 |
|          |        |    |            | MP | 12.74275902  | 31.9368278  | 5.291881561 |
| Model 49 | Female | 23 | Left-Right | LT | -0.870201111 | 15.42893982 | 8.886993408 |
|          |        |    |            | LA | -0.252794129 | 0.791200466 | 0.886993408 |
|          |        |    |            | LP | -1.628486729 | 33.46836547 | 0.886993408 |
|          |        |    |            | MT | 15.94839859  | 17.54890442 | 10.65337372 |
|          |        |    |            | MA | 19.93808285  | 3.463742824 | 5.653373718 |
|          |        |    |            | MP | 11.92663658  | 31.6447096  | 5.653373718 |
| Model 50 | Male   | 27 | Right      | LT | -4.753170013 | 17.47329712 | 9.617076874 |
|          |        |    |            | LA | -4.58410792  | 0.846061935 | 1.617076874 |
|          |        |    |            | LP | -4.894235994 | 31.34711826 | 1.617076874 |
|          |        |    |            | MT | 17.4376297   | 17.02928162 | 9.67357254  |
|          |        |    |            | MA | 18.72299401  | 4.938848047 | 4.67357254  |
|          |        |    |            | MP | 15.87823805  | 31.69727968 | 4.67357254  |
| Model 51 | Male   | 27 | Left-Right | LT | -5.847602844 | 18.60920715 | 10.45144272 |
|          |        |    |            | LA | -6.36750415  | 1.646919856 | 2.451442719 |
|          |        |    |            | LP | -5.462028546 | 31.1889448  | 2.451442719 |
|          |        |    |            | MT | 15.50682831  | 18.26582336 | 10.12742996 |
|          |        |    |            | MA | 17.03058208  | 5.149677868 | 5.127429962 |
|          |        |    |            | MP | 14.02208287  | 31.04619355 | 5.127429962 |
| Model 52 | Male   | 23 | Right      | LT | -6.710124969 | 16.89067078 | 10.43453979 |
|          |        |    |            | LA | -7.091369391 | 2.105429006 | 2.434539795 |
|          |        |    |            | LP | -6.378372944 | 29.75652173 | 2.434539795 |
|          |        |    |            | MT | 18.53771973  | 16.04142761 | 11.50170898 |
|          |        |    |            | MA | 19.96718204  | 5.351274635 | 6.501708984 |
|          |        |    |            | MP | 16.69891377  | 30.88781634 | 6.501708984 |
| Model 53 | Male   | 23 | Left-Right | LT | -6.271793365 | 17.90609741 | 10.34912109 |
|          |        |    |            | LA | -6.929615843 | 1.994530408 | 2.349121094 |
|          |        |    |            | LP | -5.808848051 | 29.10392911 | 2.349121094 |
|          |        |    |            | MT | 18.20578766  | 16.21859741 | 11.65509796 |
|          |        |    |            | MA | 18.96657873  | 4.488701314 | 6.655097961 |
|          |        |    |            | MP | 17.32849143  | 29.744773   | 6.655097961 |
| Model 54 | Male   | 31 | Right      | LT | -6.949775696 | 13.38156128 | 9.910907745 |
|          |        |    |            | LA | -7.58186743  | 1.456097497 | 1.910907745 |
|          |        |    |            | LP | -6.076699025 | 29.85360742 | 1.910907745 |
|          |        |    |            | MT | 17.9286232   | 15.48144531 | 9.890506744 |
|          |        |    |            | MA | 19.29936298  | 3.586284332 | 4.890506744 |
|          |        |    |            | MP | 16.32835454  | 29.36843799 | 4.890506744 |
| Model 55 | Male   | 31 | Left-Right | LT | -6.980163574 | 14.92962646 | 9.583488464 |
|          |        |    |            | LA | -7.859201044 | 1.77201029  | 1.583488464 |
|          |        |    |            | LP | -5.9519043   | 30.32082573 | 1.583488464 |
|          |        |    |            | MT | 17.58082962  | 16.80673218 | 10.21900558 |
|          |        |    |            | MA | 18.75730696  | 4.063027673 | 5.219005585 |
|          |        |    |            | MP | 16.42078701  | 29.3724143  | 5.219005585 |
| Model 56 | Male   | 26 | Right      | LT | -5.866142273 | 18.28367615 | 10.33089447 |
|          |        |    |            | LA | -7.032096104 | 0.388513701 | 2.33089447  |
|          |        |    |            | LP | -5.025887145 | 31.17998611 | 2.33089447  |
|          |        |    |            | MT | 17.1638298   | 18.32566833 | 10.42191696 |
|          |        |    |            | MA | 18.22995072  | 5.804973429 | 5.421916962 |
|          |        |    |            | MP | 15.94380845  | 32.65379463 | 5.421916962 |
| Model 57 | Male   | 26 | Left-Right | LT | -6.425037384 | 16.33033752 | 10.15962219 |
|          |        |    |            | LA | -7.311868374 | 0.868338464 | 2.159622192 |
|          |        |    |            | LP | -5.526613007 | 30.46666922 | 2.159622192 |
|          |        |    |            | MT | 17.32896423  | 18.70248413 | 10.89536667 |
|          |        |    |            | MA | 18.58387369  | 5.82180178  | 5.895366669 |
|          |        |    |            | MP | 15.96667306  | 32.68535735 | 5.895366669 |
| Model 58 | Male   | 26 | Right      | LT | -6.574863434 | 17.79455566 | 10.4603653  |
|          |        |    |            | LA | -7.800471526 | 2.018199113 | 2.460365295 |
|          |        |    |            | LP | -5.409897707 | 32.7903074  | 2.460365295 |
|          |        |    |            | MT | 15.42767334  | 17.45817566 | 11.3729744  |
|          |        |    |            | MA | 16.83670715  | 4.852240004 | 6.372974396 |
|          |        |    |            | MP | 13.86301261  | 31.45642919 | 6.372974396 |
| Model 59 | Male   | 26 | Left-Right | LT | -6.51915741  | 17.93173218 | 10.64603806 |
|          |        |    |            | LA | -7.748683082 | 1.773943306 | 2.646038055 |
|          |        |    |            | LP | -5.347928033 | 33.32342136 | 2.646038055 |
|          |        |    |            | MT | 15.51846313  | 16.43035889 | 11.32564545 |
|          |        |    |            | MA | 16.97706702  | 5.608829613 | 6.325645447 |
|          |        |    |            | MP | 13.43527693  | 31.88572737 | 6.325645447 |

|          |        |    |            |    |              |             |             |
|----------|--------|----|------------|----|--------------|-------------|-------------|
| Model 60 | Male   | 33 | Left-Right | LT | -5.141426086 | 18.38594055 | 9.398273468 |
|          |        |    |            | LA | -5.227623116 | 1.230063759 | 1.398273468 |
|          |        |    |            | LP | -5.064890585 | 33.61887422 | 1.398273468 |
|          |        |    |            | MT | 18.10092163  | 17.47338867 | 10.74182892 |
|          |        |    |            | MA | 19.96244744  | 7.120039288 | 5.741828918 |
|          |        |    |            | MP | 15.51703374  | 31.84433858 | 5.741828918 |
| Model 61 | Male   | 25 | Right      | LT | -5.566307068 | 16.36196899 | 9.409191132 |
|          |        |    |            | LA | -6.22784109  | 1.129028526 | 1.409191132 |
|          |        |    |            | LP | -4.941602473 | 30.74684956 | 1.409191132 |
|          |        |    |            | MT | 17.41821671  | 15.25602722 | 11.7118187  |
|          |        |    |            | MA | 18.81572111  | 4.501540632 | 6.711818695 |
|          |        |    |            | MP | 15.50620298  | 29.96991713 | 6.711818695 |
| Model 62 | Male   | 25 | Left-Right | LT | -5.596893311 | 17.08311462 | 9.681156158 |
|          |        |    |            | LA | -6.889317137 | 1.832966776 | 1.681156158 |
|          |        |    |            | LP | -4.435088569 | 30.79200309 | 1.681156158 |
|          |        |    |            | MT | 18.05931473  | 15.04043579 | 11.54192734 |
|          |        |    |            | MA | 19.16839634  | 3.461291109 | 6.541927338 |
|          |        |    |            | MP | 16.68481665  | 29.39060799 | 6.541927338 |
| Model 63 | Male   | 25 | Right      | LT | -2.031757355 | 17.7149353  | 8.915805817 |
|          |        |    |            | LA | -1.812810188 | 0.765580653 | 0.915805817 |
|          |        |    |            | LP | -2.260840093 | 35.44891489 | 0.915805817 |
|          |        |    |            | MT | 17.40576935  | 16.63418579 | 10.5669136  |
|          |        |    |            | MA | 19.17616979  | 4.129886895 | 5.566913605 |
|          |        |    |            | MP | 15.46408244  | 30.34827718 | 5.566913605 |
| Model 64 | Female | 22 | Left-Right | LT | -6.510452271 | 17.45310974 | 9.051223755 |
|          |        |    |            | LA | -8.005799475 | 2.849530188 | 1.051223755 |
|          |        |    |            | LP | -5.142592134 | 30.85180632 | 1.051223755 |
|          |        |    |            | MT | 19.07266617  | 14.59960938 | 10.27719116 |
|          |        |    |            | MA | 20.57728685  | 4.920535096 | 5.277191162 |
|          |        |    |            | MP | 16.44395123  | 31.59150508 | 5.277191162 |
| Model 65 | Male   | 27 | Right      | LT | -5.047637939 | 17.79708862 | 10.7525177  |
|          |        |    |            | LA | -5.012669175 | 0.559911876 | 2.7525177   |
|          |        |    |            | LP | -5.079396951 | 33.45207953 | 2.7525177   |
|          |        |    |            | MT | 18.26823807  | 18.12567139 | 9.438083649 |
|          |        |    |            | MA | 19.05544863  | 5.54748789  | 4.438083649 |
|          |        |    |            | MP | 17.37988326  | 32.31995479 | 4.438083649 |
| Model 66 | Male   | 27 | Left-Right | LT | -5.162563324 | 18.52090454 | 10.6171608  |
|          |        |    |            | LA | -5.669414113 | 1.241772892 | 2.617160797 |
|          |        |    |            | LP | -4.712424337 | 33.86666506 | 2.617160797 |
|          |        |    |            | MT | 17.37041092  | 19.23251343 | 9.659667969 |
|          |        |    |            | MA | 18.20664435  | 4.8727655   | 4.659667969 |
|          |        |    |            | MP | 16.62510425  | 32.03087271 | 4.659667969 |
| Model 67 | Male   | 26 | Right      | LT | -1.078052521 | 15.74301147 | 9.864334106 |
|          |        |    |            | LA | -1.331925045 | 1.010257007 | 1.864334106 |
|          |        |    |            | LP | -0.784893115 | 33.02993418 | 1.864334106 |
|          |        |    |            | MT | 16.86977005  | 17.76011658 | 12.01987457 |
|          |        |    |            | MA | 18.14510326  | 5.799892486 | 7.019874573 |
|          |        |    |            | MP | 15.49506012  | 30.57002442 | 7.019874573 |
| Model 68 | Male   | 26 | Left-Right | LT | -4.081863403 | 16.29467773 | 9.369537354 |
|          |        |    |            | LA | -4.775996629 | 1.203438518 | 1.369537354 |
|          |        |    |            | LP | -3.283750561 | 33.6465511  | 1.369537354 |
|          |        |    |            | MT | 17.90004349  | 17.02482605 | 11.05999374 |
|          |        |    |            | MA | 19.03843963  | 4.796267638 | 6.059993744 |
|          |        |    |            | MP | 16.66124656  | 30.33188154 | 6.059993744 |
| Model 69 | Male   | 24 | Right      | LT | -5.196990967 | 16.84936523 | 10.56828308 |
|          |        |    |            | LA | -5.53270297  | 0.497523056 | 2.568283081 |
|          |        |    |            | LP | -4.897130506 | 31.45495243 | 2.568283081 |
|          |        |    |            | MT | 18.28019333  | 15.59370422 | 11.63693237 |
|          |        |    |            | MA | 19.83597339  | 4.353616603 | 6.636932373 |
|          |        |    |            | MP | 16.32697598  | 29.70516812 | 6.636932373 |
| Model 70 | Male   | 24 | Left-Right | LT | -6.239719391 | 16.08476257 | 10.31344604 |
|          |        |    |            | LA | -6.394853267 | 0.856754034 | 2.313446045 |
|          |        |    |            | LP | -6.086490391 | 31.12578754 | 2.313446045 |
|          |        |    |            | MT | 17.50368881  | 17.67564392 | 11.94842911 |
|          |        |    |            | MA | 19.7376859   | 5.022671004 | 6.948429108 |
|          |        |    |            | MP | 15.3951008   | 29.61832157 | 6.948429108 |
