# Supplementary material for: Talar Dome Investigation and Talocrural Joint Axis Analysis Based on Three-Dimensional (3D) Models: Implications for Prosthetic Design
Source: Biomed Res Int. 2019 Nov 7;2019:8634159. doi: 10.1155/2019/8634159 (PMC6885182; doi:10.1155/2019/8634159)
Supplement: Supplementary Materials — The supplementary materials of the present study included three supplementary data files, which are referred in the manuscript and are all the raw data of this original research. [file 8634159.f1.zip]

Archive with 3 entries (3 files):
- 8634159.f1/Supplementary data 1.pdf
- 8634159.f1/Supplementary data 2.pdf
- 8634159.f1/Supplementary data 3.pdf
